# Supplementary material for: Simple, Low-Cost and Long-Lasting Film for Virus Inactivation Using Avian Coronavirus Model as Challenge
Source: PubMed Central journal article supplement (PMC7558860; doi:10.3390/ijerph17186456), 2020-09-04
Supplement: ijerph-17-06456-s001.pdf [file ijerph-17-06456-s001.pdf]

**Table S1.** The p values from comparisons between experimental groups (film + challenge and respective positive control group) for Log10 ACoV RNA copies and qualitative results (virus isolation and RT-qPCR).

|                               | <b>Parameter</b>       | <b>Hands</b> | <b>Inanimate surface</b> |
|-------------------------------|------------------------|--------------|--------------------------|
| <b>High challenge</b>         | RT-qPCR (quantitative) | 0.0041       | 0.0028                   |
|                               | Virus isolation        | 0.0152       | 0.0022                   |
|                               | RT-qPCR (qualitative)  | 0.0022       | 0.0022                   |
| <b>Intermediate challenge</b> | RT-qPCR (quantitative) | 0.0028       | 0.0021                   |
|                               | Virus isolation        | 0.0022       | 0.0152                   |
|                               | RT-qPCR (qualitative)  | 0.0022       | 0.0022                   |
| <b>Low challenge</b>          | RT-qPCR (quantitative) | 0.0021       | 0.0015                   |
|                               | Virus isolation        | 0.0152       | 0.0013                   |
|                               | RT-qPCR (qualitative)  | 0.0022       | 0.0025                   |
